# Supplementary material for: Grafting of multi-sensitive PDMAEMA brushes onto carbon nanotubes by ATNRC: tunable thickening/thinning and self-assembly behaviors in aqueous solutions
Source: Royal Society of Chemistry journal article supplement (doi:10.1039/c6ra20088e), 2016-01-01
Supplement: c6ra20088e1.pdf [file c6ra20088e1.pdf]

Electronic Supplementary Material (ESI) for RSC Advances  
This journal is © The Royal Society of Chemistry 2016

## Electronic Supplementary Information

### **Grafting of multi-sensitive PDMAEMA brushes onto carbon nanotubes by ATNRC: tunable thickening/thinning and self-assembly behaviors in aqueous solutions**

Yeqiang Tan,<sup>‡</sup> Wenqian Zhang,<sup>‡</sup> Yanhui Li, Yanzhi Xia<sup>\*</sup>, and Kunyan Sui<sup>\*</sup>

Collaborative Innovation Center for Marine Biomass Fibers, Materials and Textiles of Shandong Province, School of Materials Science and Engineering, Qingdao University, Qingdao, 266071, China.  
E-mail: [kunyansui@163.com](mailto:kunyansui@163.com).

**Table S1** Constituent parameters of MWNTs-*g*-PDMAEMA.

| Sample                                  | Feed ratio <sup>a</sup> | $M_n$ <sup>b</sup> | $M_w/M_n$ <sup>b</sup> | $f(\text{wt.}\%)$ <sup>c</sup> | Graft density <sup>d</sup> |
|-----------------------------------------|-------------------------|--------------------|------------------------|--------------------------------|----------------------------|
| MWNTs- <i>g</i> -PDMAWMA <sub>50</sub>  | 50:1                    | 4770               | 1.05                   | 75.4                           | 1/129                      |
| MWNTs- <i>g</i> -PDMAWMA <sub>100</sub> | 100:1                   | 8420               | 1.17                   | 67.2                           | 1/342                      |
| MWNTs- <i>g</i> -PDMAWMA <sub>150</sub> | 150:1                   | 11170              | 1.07                   | 37.4                           | 1/1558                     |

<sup>a</sup> The ratio of molar weight of DMAEMA monomer to EBiB.

<sup>b</sup> The molecular weight data of PDMAEMA determined by GPC.

<sup>c</sup> The weight fraction of PDMAEMA in MWNTs-*g*-PDMAEMA calculated from TGA.

<sup>d</sup> The average graft density (C/PDMAEMA chain) calculated from GPC and TGA.

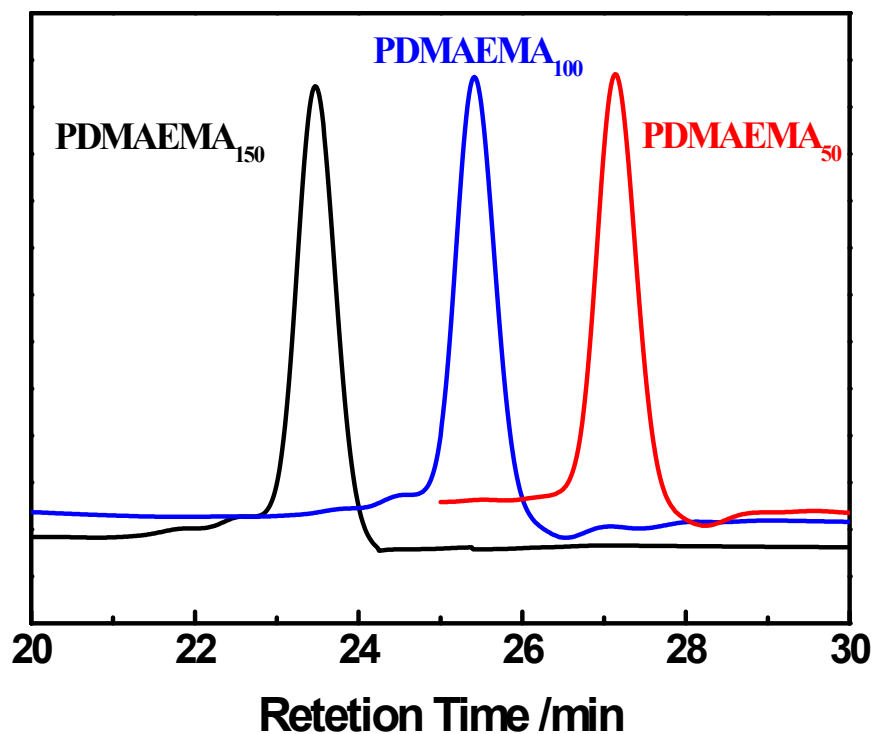

**Fig. S1** GPC traces of PDMAEMA. The single peaks of typical Gaussian distributions indicated formation of desired PDMAEMA homopolymer. The number-average molecular weight is 4770, 8420, 11170, and PDI ( $M_w/M_n$ ) is 1.05, 1.17 and 1.07, respectively, clarifying that the ATRP polymerization of PDMAEMA were well-controlled.

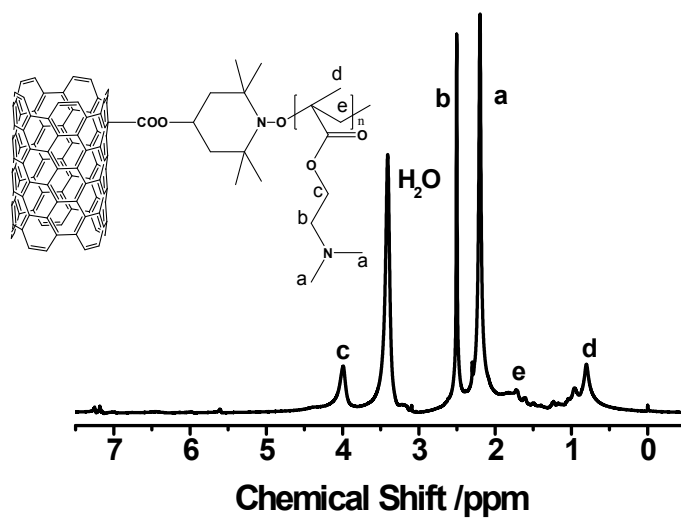

**Fig. S2**  $^1\text{H}$  NMR spectra of MWNTs-g-PDMAEMA<sub>100</sub> in  $\text{D}_2\text{O}$ .

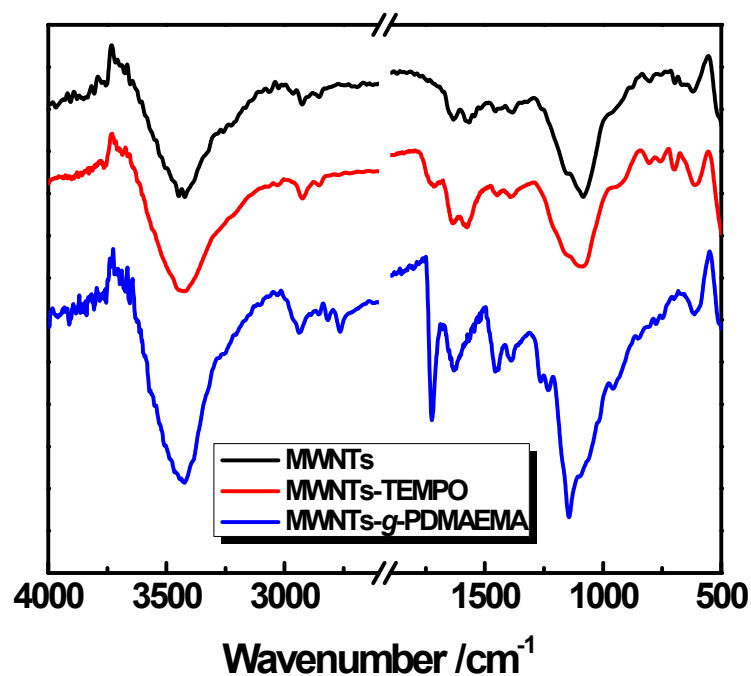

**Fig. S3** FT-IR spectrum of MWNTs, MWNTs-COOH and MWNTs-g-PDMAEMA. In MWNTs-TEMPO clearly showed that the characteristic carboxyl group stretching vibrations appeared at  $1700\text{ cm}^{-1}$ . The appearance of characteristic absorption bands at  $2950\text{ cm}^{-1}$  (C-H stretching of methyl and  $-\text{CH}_2-$  groups),  $2821$  and  $2770\text{ cm}^{-1}$  (C-H stretching of N- $(\text{CH}_3)_2$  group),  $1726\text{ cm}^{-1}$  (C=O stretching),  $1454\text{ cm}^{-1}$  ( $-\text{CH}_2-$  bending(scissors) vibration and  $\text{CH}_3$  antisymmetric deformation), and  $1150\text{ cm}^{-1}$  (C-C-N bending) demonstrated the presence of PDMAEMA chains on MWNTs-g-PDMAEMA.

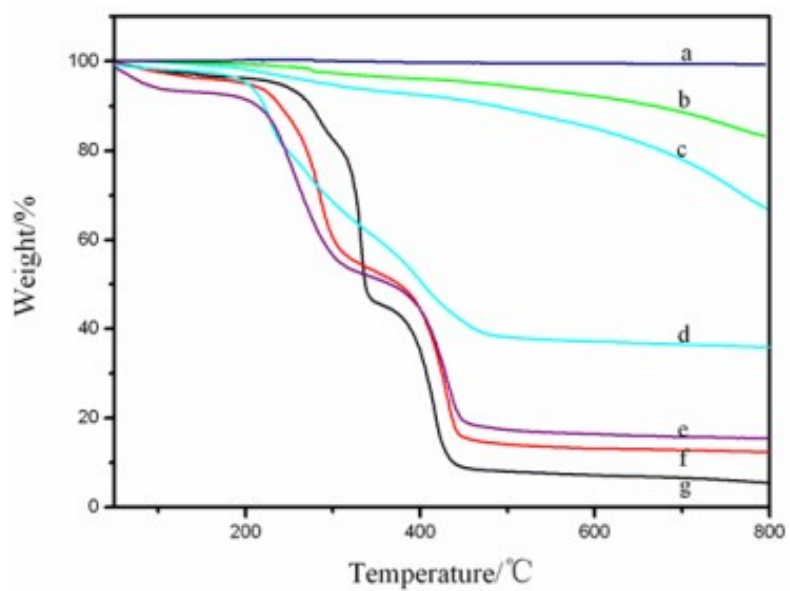

**Fig. S4** TGA curves of pristine MWNTs (a), MWNTs-COOH (b), MWNTs-TEMPO (c), MWNTs-g-PDMAEMA150 (d), MWNTs-g-PDMAEMA100 (e), MWNTs-g-PDMAEMA50 (f), and PDMAEMA (g) powders.

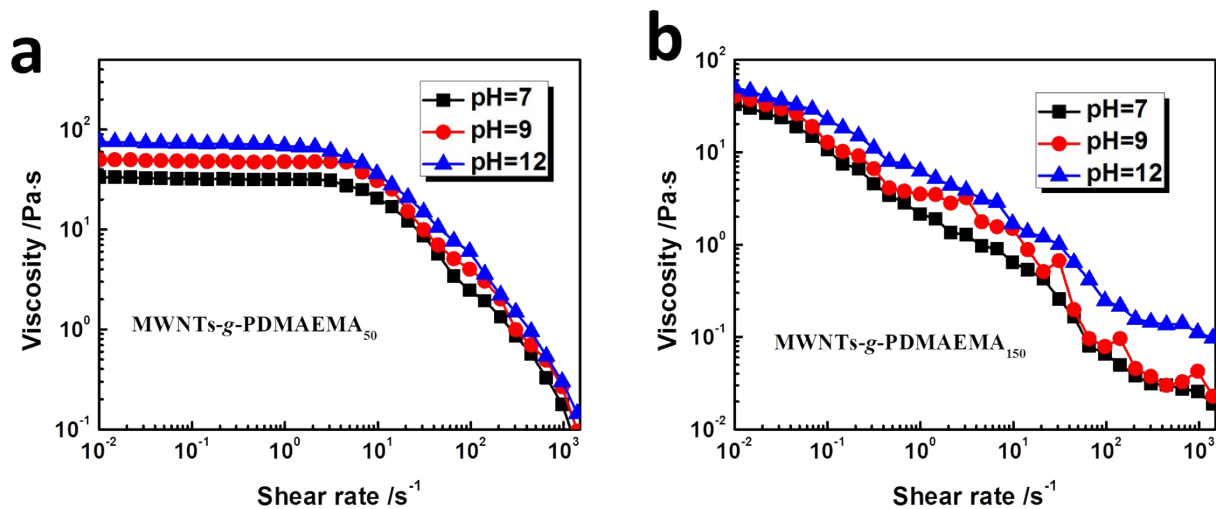

Fig. S5  $\eta$  as a function of  $\dot{\gamma}$  for MWNTs-g-PDMAEMA<sub>50</sub> (a) MWNTs-g-PDMAEMA<sub>150</sub> (b) suspensions with different pH at 25 °C ( $C = 20$  wt%).

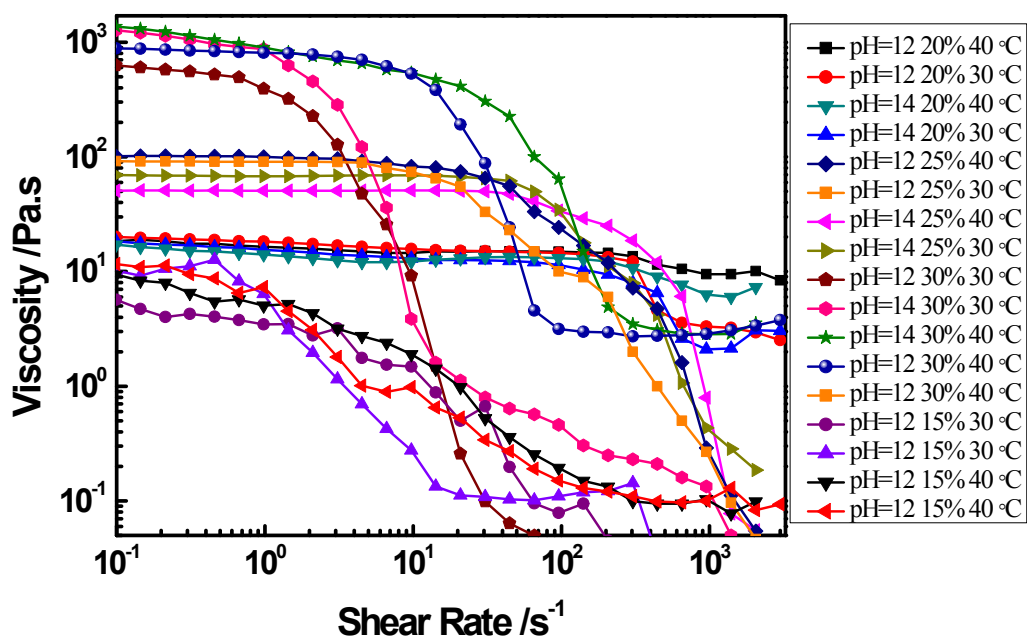

**Fig S6.**  $\eta$  as a function of  $\dot{\gamma}$  for MWNTs-g-PDMAEMA<sub>100</sub> suspensions at various pH values, temperatures and concentration. It is obvious that no shear-thickening behavior take placed at all pH, temperatures and concentrations.

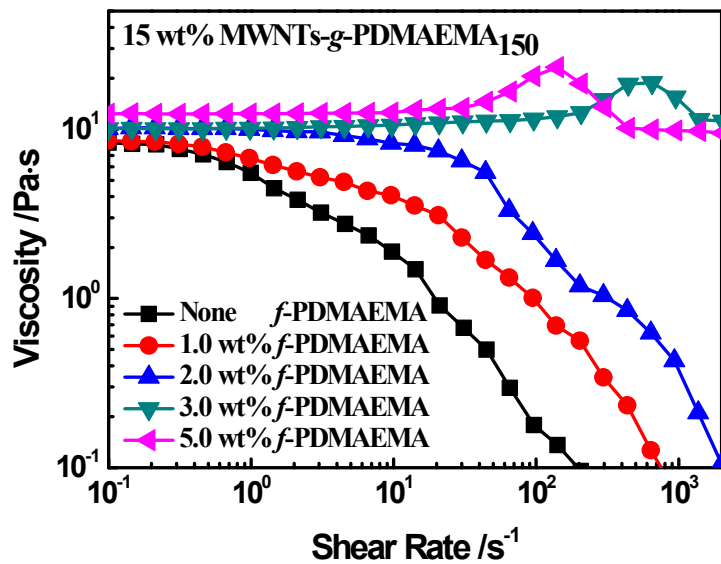

**Fig. S7**  $\eta$  as a function of  $\dot{\gamma}$  for MWNT-g-PDMAEMA<sub>150</sub>/*f*-PDMAEMA suspension with different concentration of *f*-PDMAEMAM at pH=14.

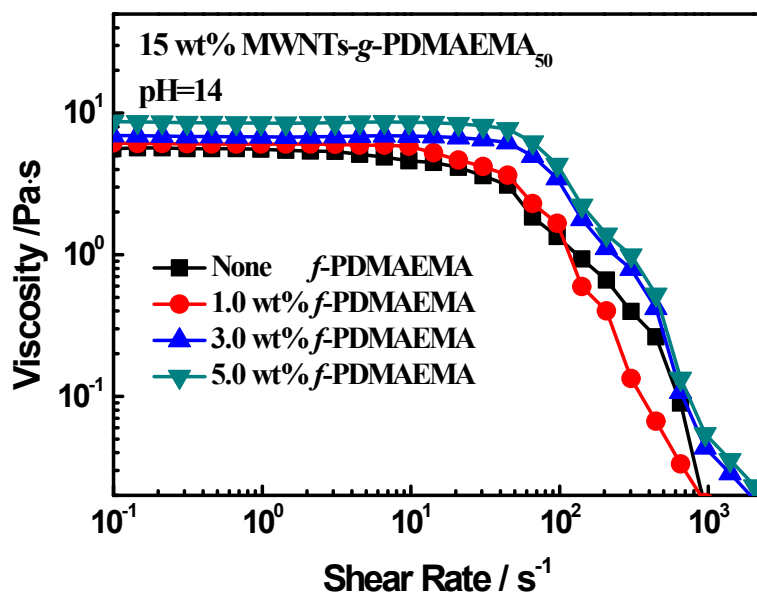

**Fig. S8**  $\eta$  as a function of  $\dot{\gamma}$  for MWNT-g-PDMAEMA<sub>50</sub>/*f*-PDMAEMA suspension with different concentration of *f*-PDMAEMA at pH=14.

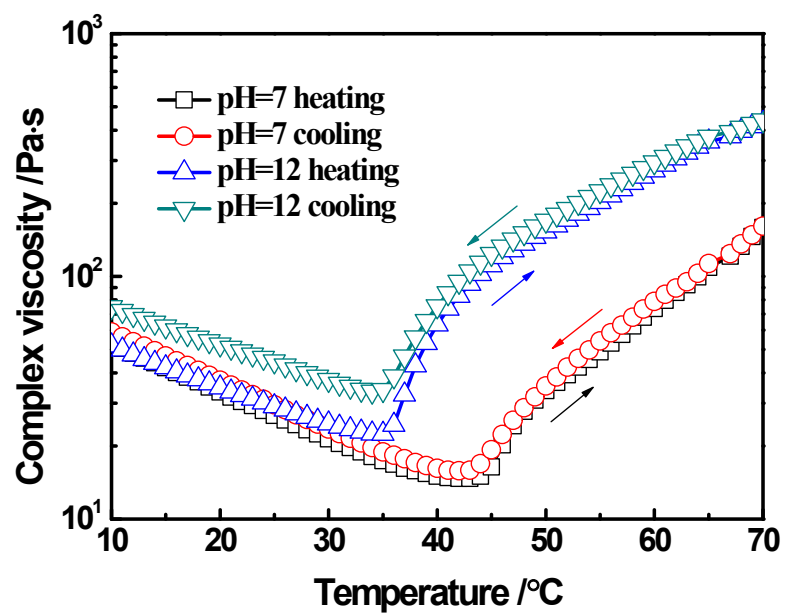

**Fig. S9** Temperature dependence of complex viscosity for MWNTs-g-PDMAEMA<sub>100</sub> aqueous solution at pH 7 and 12.

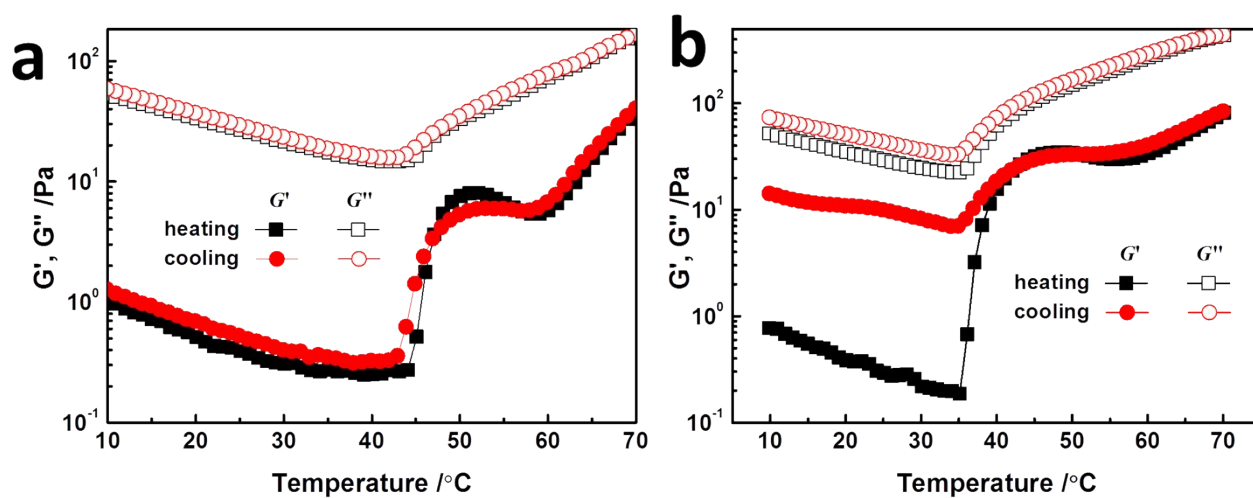

**Fig. S10** Dynamic temperature ramp for MWNTs-g-PDMAEMA100 suspension ( $C = 20$  wt%) at pH=7 (a) and 12 (b) monitored at  $1 \text{ rad s}^{-1}$  with a temperature rate of  $1 \text{ }^{\circ}\text{C min}^{-1}$ .
